# Supplementary material
Source: publisher site journal article supplement (https://www.dovepress.com/article/487405)
Supplement: Supplementary file 1 [file get_supplementary_file.php]

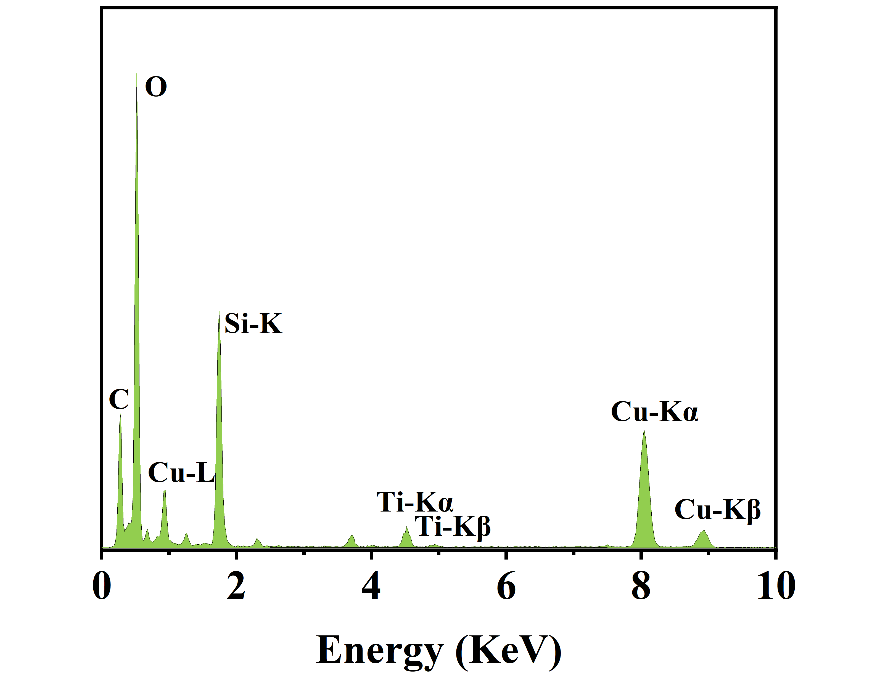


Figure. S1. X-ray energy dispersive spectrum (EDS) of Ti3C2@MSNs.


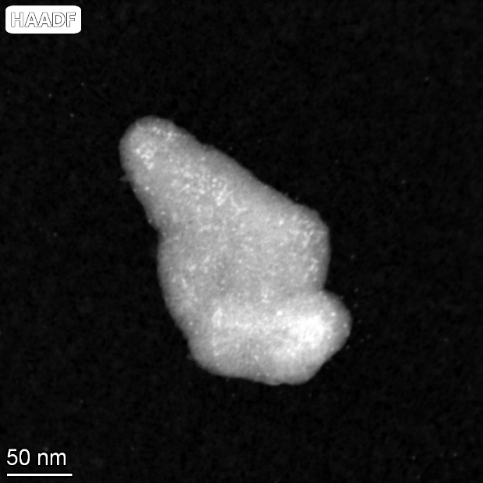

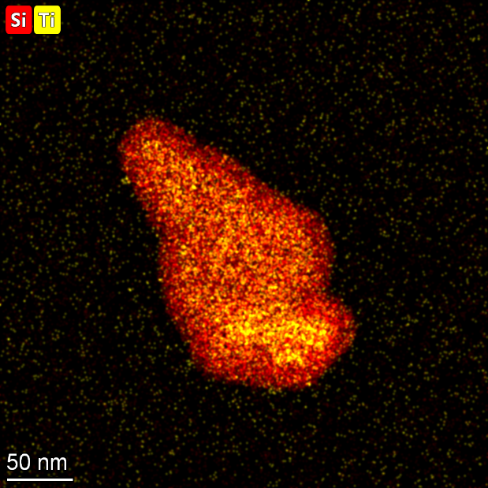


Figure. S2. The corresponding elemental mappings of Si and Ti.


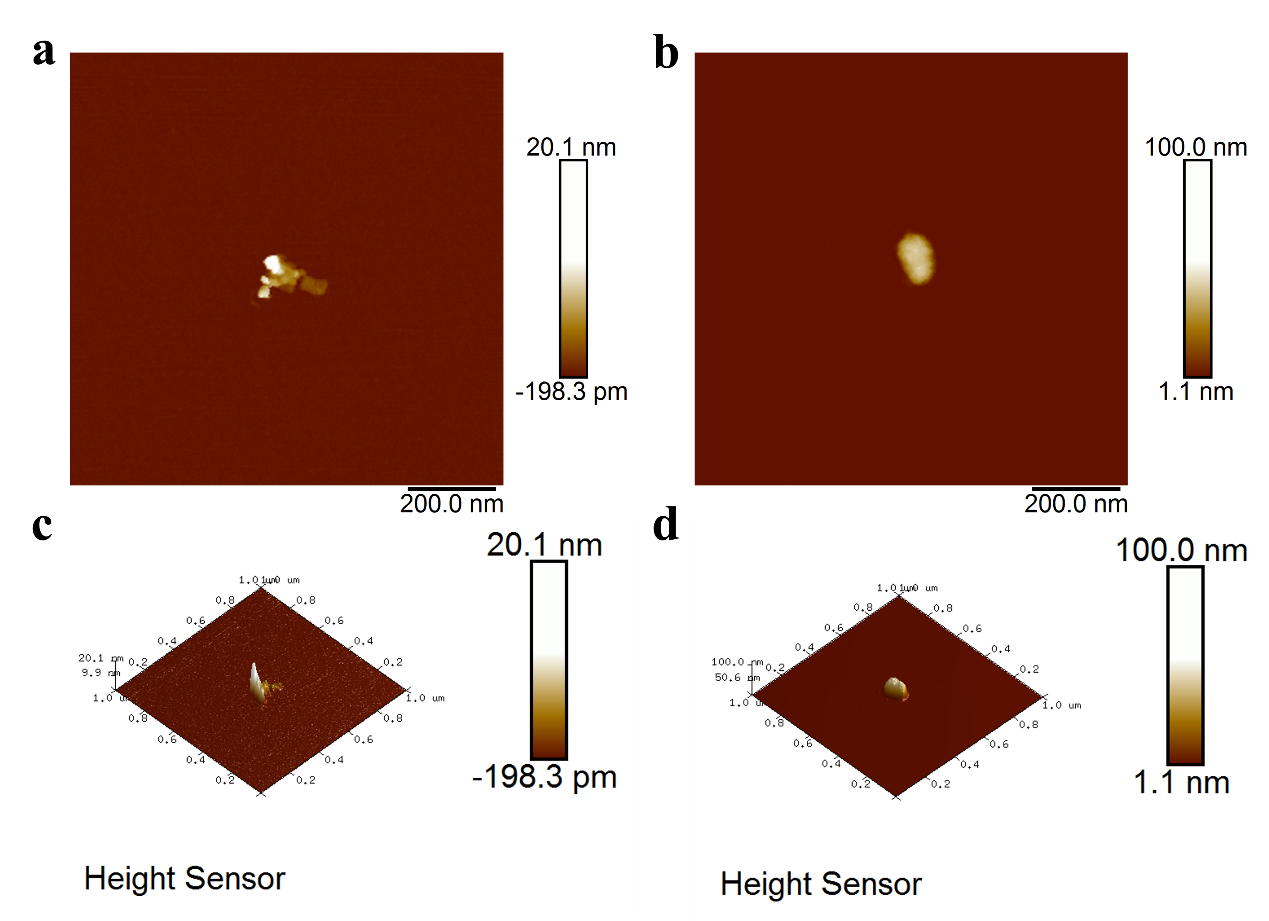


Figure. S3. a) Atomic force microscopy image and c) corresponding height profiles of Ti3C2. b) Atomic force microscopy image and d) corresponding height profiles of Ti3C2@MSNs.


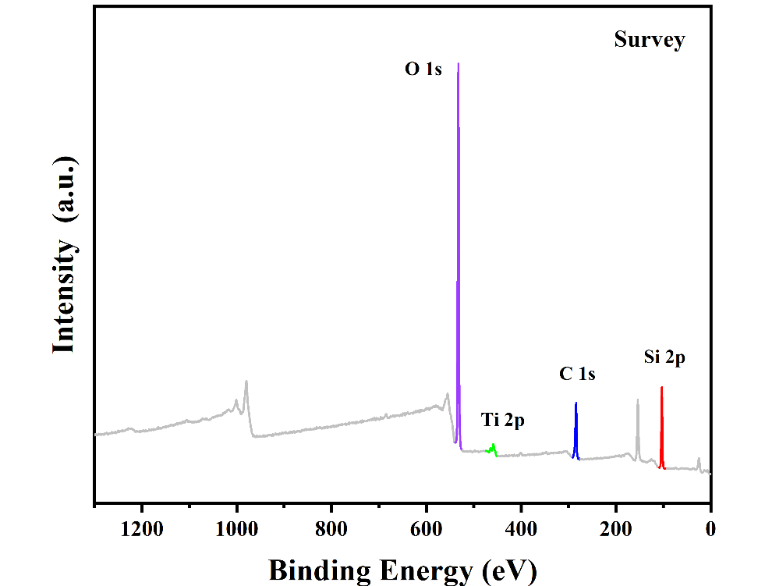


Figure. S4. X-ray photoelectron spectroscopy (XPS) of Ti3C2@MSNs.


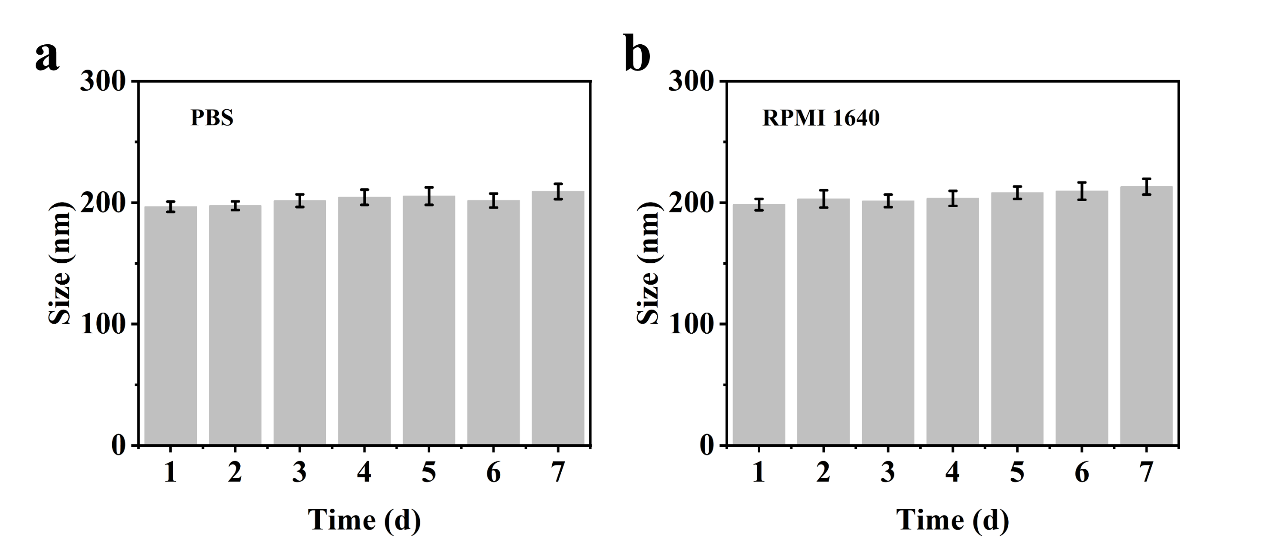


Figure. S5. The particle size of Ti3C2@MSNs in a) PBS and b) RPMI 1640 at different times (n=3).


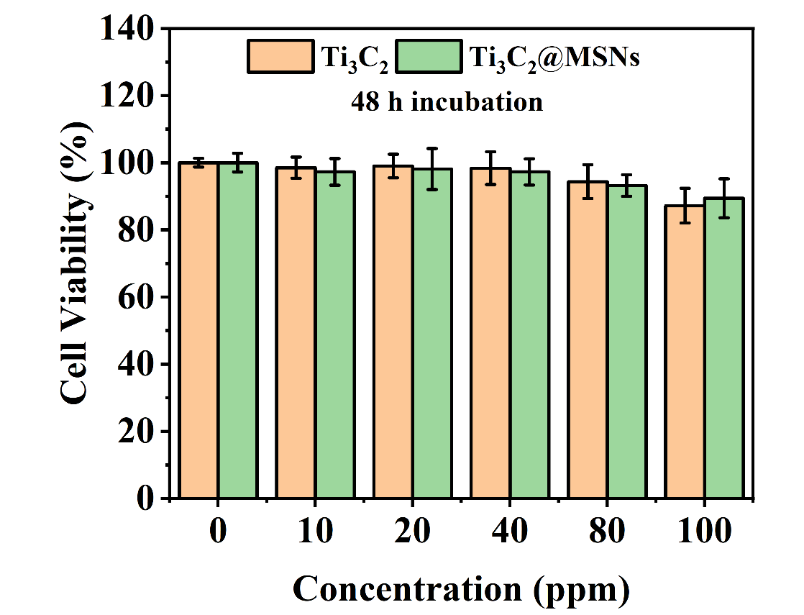


Figure. S6. Cytotoxicity of Ti3C2 and Ti3C2@MSNs incubated with 4T1 cells for 48 h (n=6).


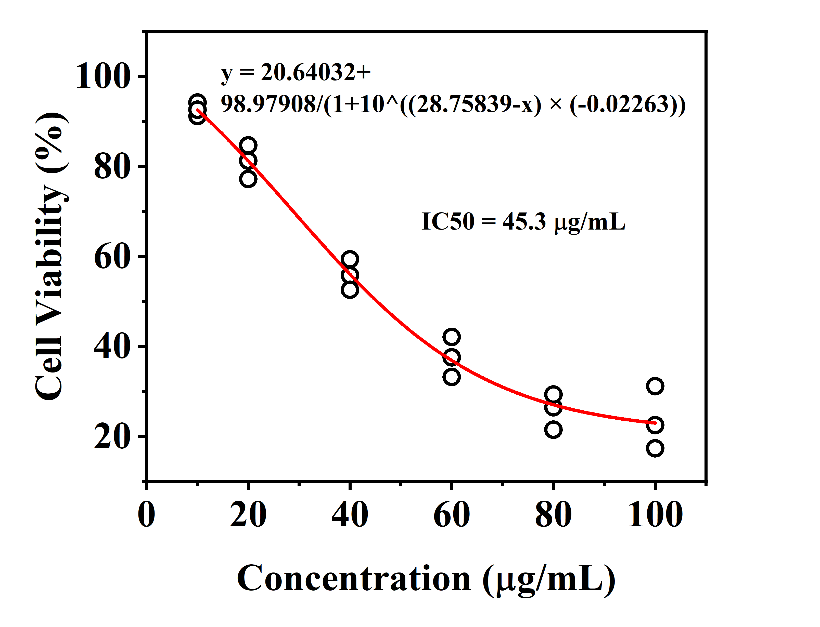


Figure. S7. The IC50 of Ti3C2@MSNs combined with PTT for 4T1 cells.


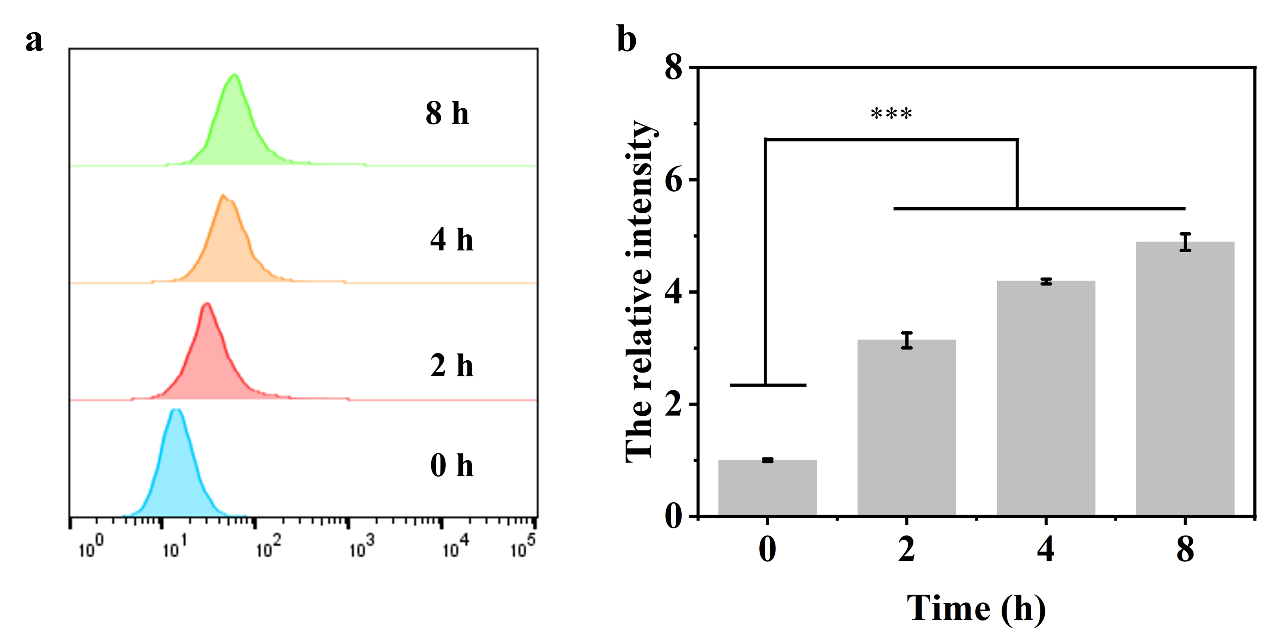


Figure. S8. Assessing the cellular uptake capacity of FITC- Ti3C2@MSNs using flow cytometry. a) Flow cytometric analysis and b) the relative intensity regarding the accumulation of FITC- Ti3C2@MSNs contents in 4T1 cell after 2 h, 4 h, and 8 h (n = 3). Statistical significances were calculated via Student’s t test. *p < 0.05, **p < 0.01, and ***p < 0.001.


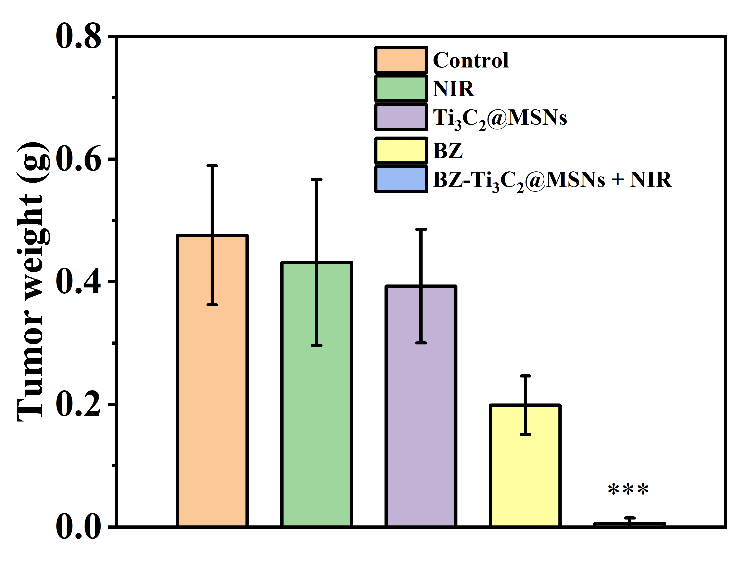


Figure. S9. Tumor weight of resected tumors from different groups of mice at day 14 (n=5). Statistical significances were calculated via Student’s t test. *p < 0.05, **p < 0.01, and ***p < 0.001.


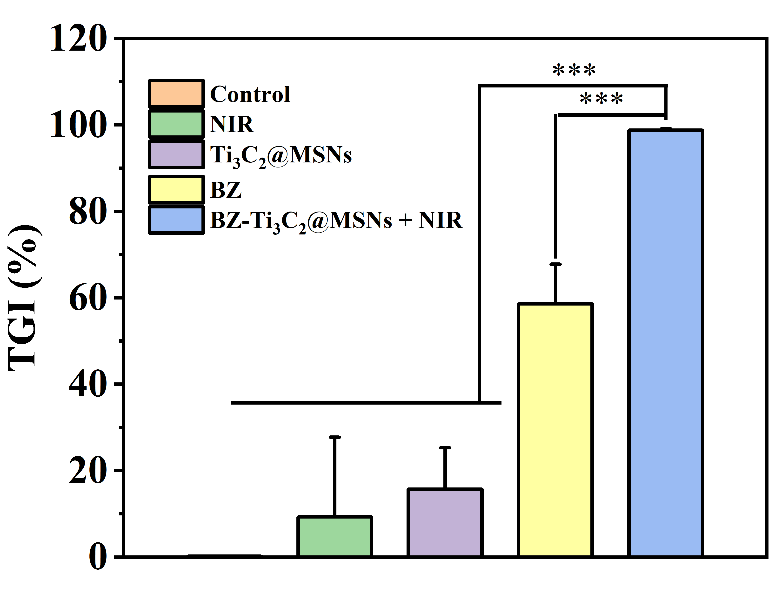


Figure. S10. The tumor growth inhibition value (TGI) of different treatment groups (n=5). Statistical Statistical significances were calculated via Student’s t test. *p < 0.05, **p < 0.01, and ***p < 0.001.


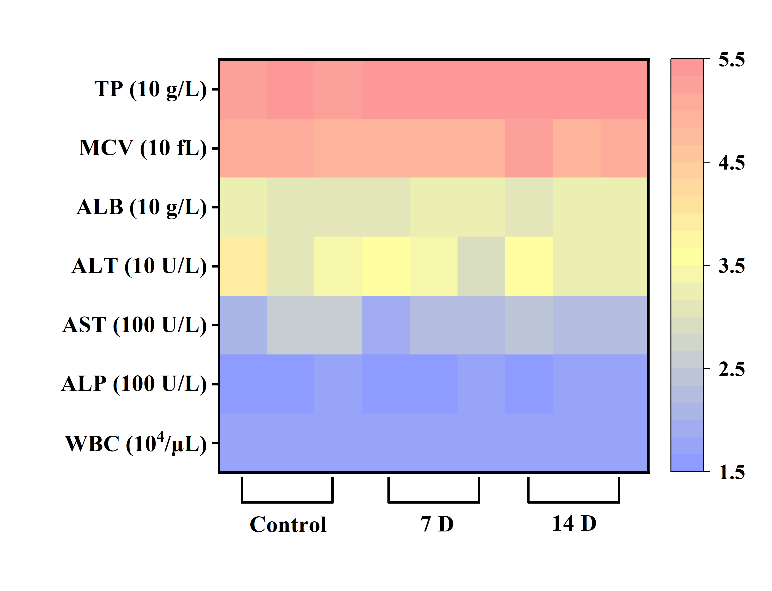


Figure. S11. Hematological indexes and biochemical data of mice after i.v. injection with PBS and BZ- Ti3C2@MSNs.
